# Supplementary material for: Engineering of CRISPR-Cas12b for human genome editing
Source: PubMed Central journal article supplement (PMC6342934; doi:10.1038/s41467-018-08224-4), 2019-01-22
Supplement: 41467_2018_8224_MOESM1_ESM.pdf [file 41467_2018_8224_MOESM1_ESM.pdf]

# **Engineering of CRISPR-Cas12b for human genome editing**

Strecker et al.

# Supplementary Figure 1. PAM discovery of Cas12b orthologs

a

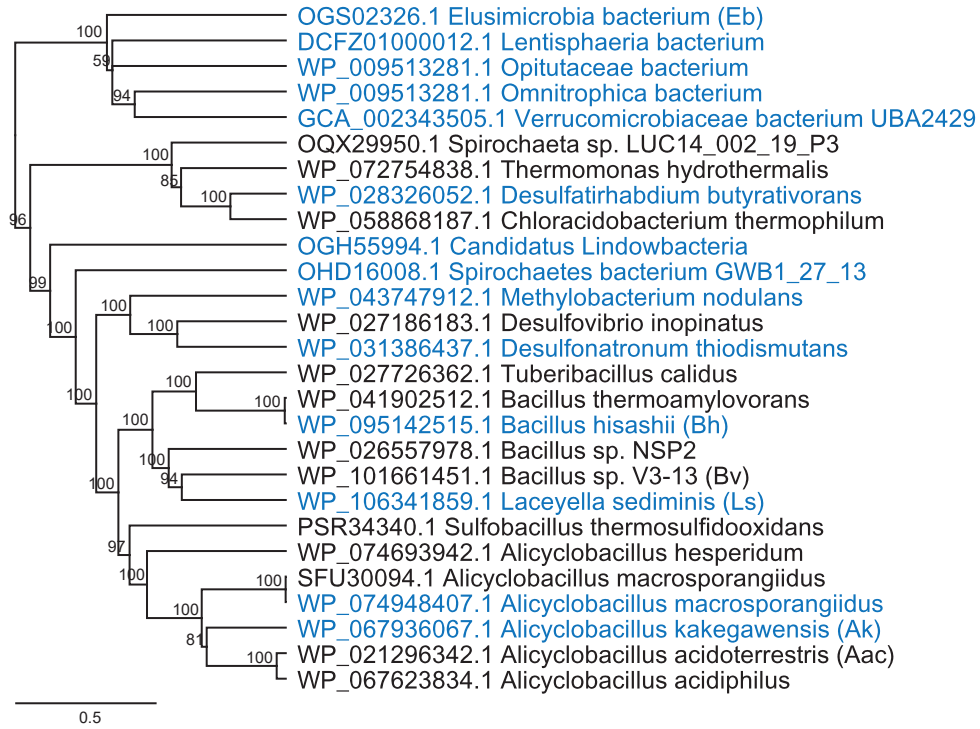

b

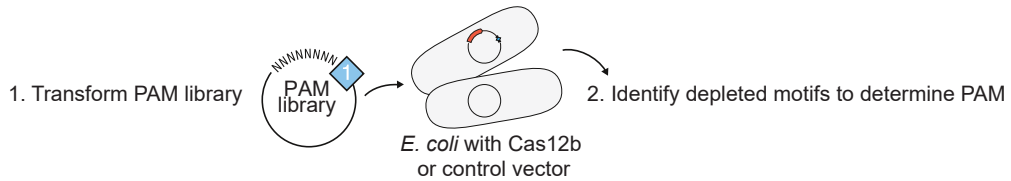

c

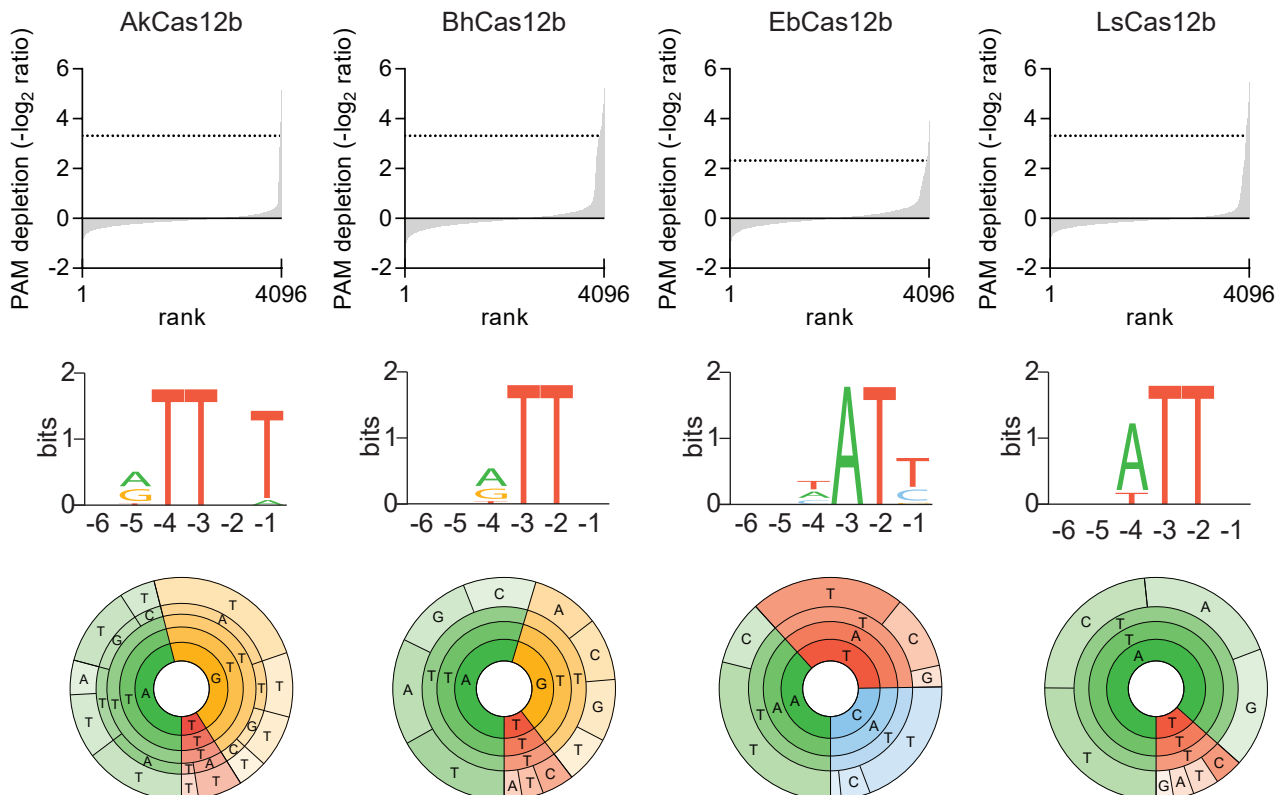

### **Supplementary Figure 1. PAM discovery of Cas12b orthologs**

**a)** Phylogenetic tree of the subtype V-B effector Cas12b proteins. Sequences are denoted by Genbank protein accession number and species name. The proteins that were experimentally studied in this work are highlighted in blue. **b)** Schematic of the PAM discovery assay in *E. coli*<sup>9</sup>. **c)** Depleted PAMs were detected in only 4 out of 14 Cas12b systems in *E. coli*. A depletion threshold was set at a  $-\log_2$  ratio of 3.32 (dotted line) except for EbCas12b, which had a threshold set at 2.32. Depleted PAMs are shown as sequence motifs as well as PAM wheels<sup>23</sup> starting in the middle of the wheel for the first 5' base exhibiting sequence information.

# Supplementary Figure 2. Cas12b RNA-Seq and in vitro reconstitution

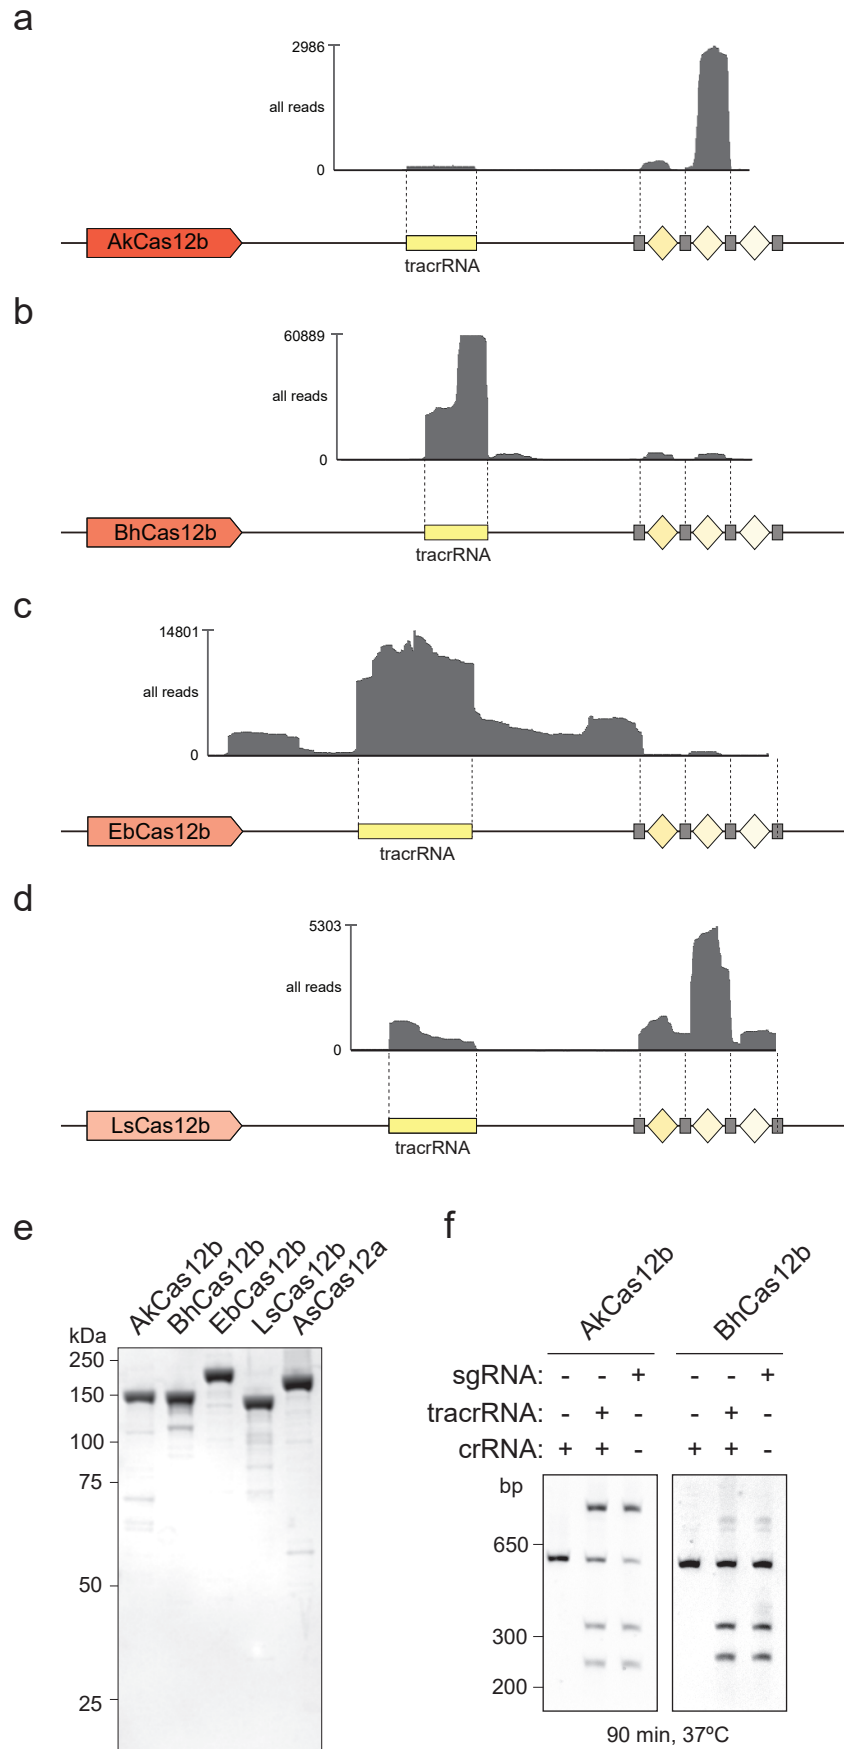



## **Supplementary Figure 2. Cas12b RNA-Seq and in vitro reconstitution**

**a-d)** Alignment of small RNA-Seq reads for AkCas12b, BhCas12b, EbCas12b, and LsCas12b.

The location of the tracrRNA used in cleavage reactions is highlighted in yellow. **e)** Coomassie stained SDS-PAGE gel of purified Cas12b proteins used in this study and commercially produced AsCas12a (IDT). **f)** In vitro cleavage reactions with AkCas12b and BhCas12b comparing tracrRNA and crRNA to v1 sgRNA scaffolds.

# Supplementary Figure 3. Cas12b sgRNA optimization in mammalian cells

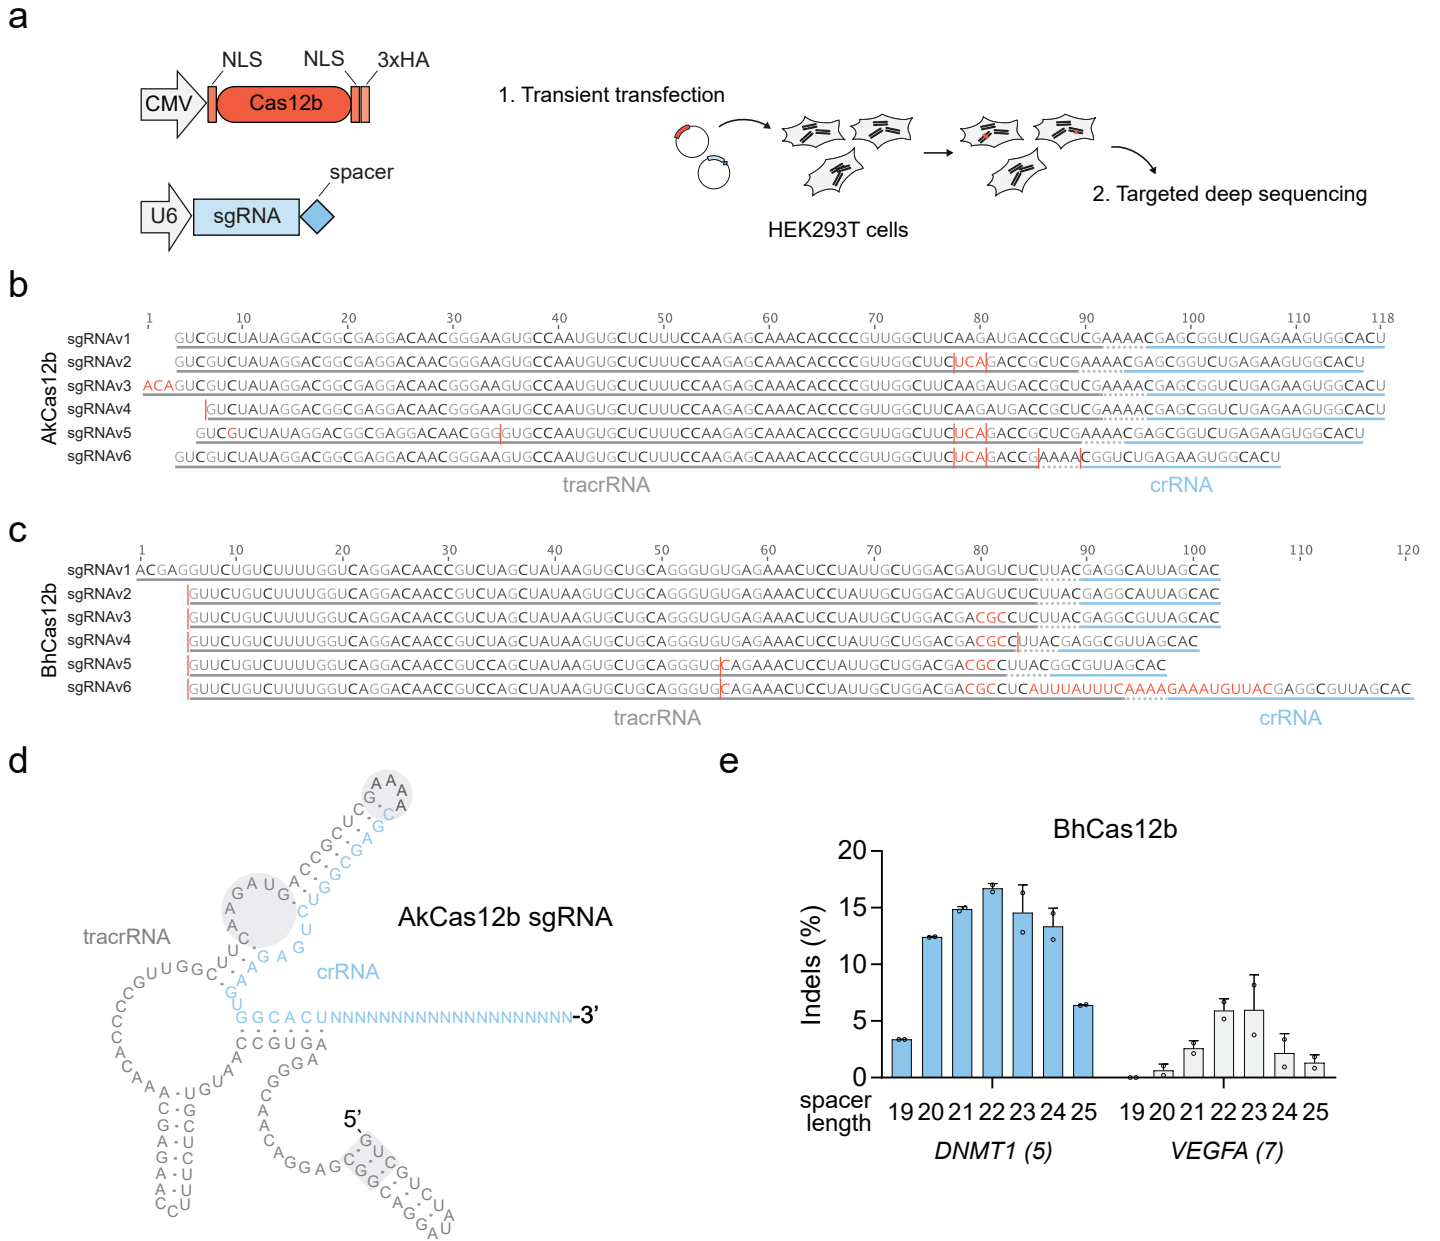

**Supplementary Figure 3. Cas12b sgRNA optimization in mammalian cells**

**a)** Schematic of expression constructs and assay for indel activity in mammalian cells. **b,c)** Sequence of AkCas12b and BhCas12b sgRNA variants. The location of deletions is denoted with a red line. **d)** Schematic of AkCas12b sgRNA design 1 with grey shading highlighting the location of changes. **e)** Indel activity in 293T cells with BhCas12b and varying spacer lengths. Error bars represent s.d. from n=2 replicates. Source data are provided as a Source Data file.

# Supplementary Figure 4. Rational engineering of BhCas12b

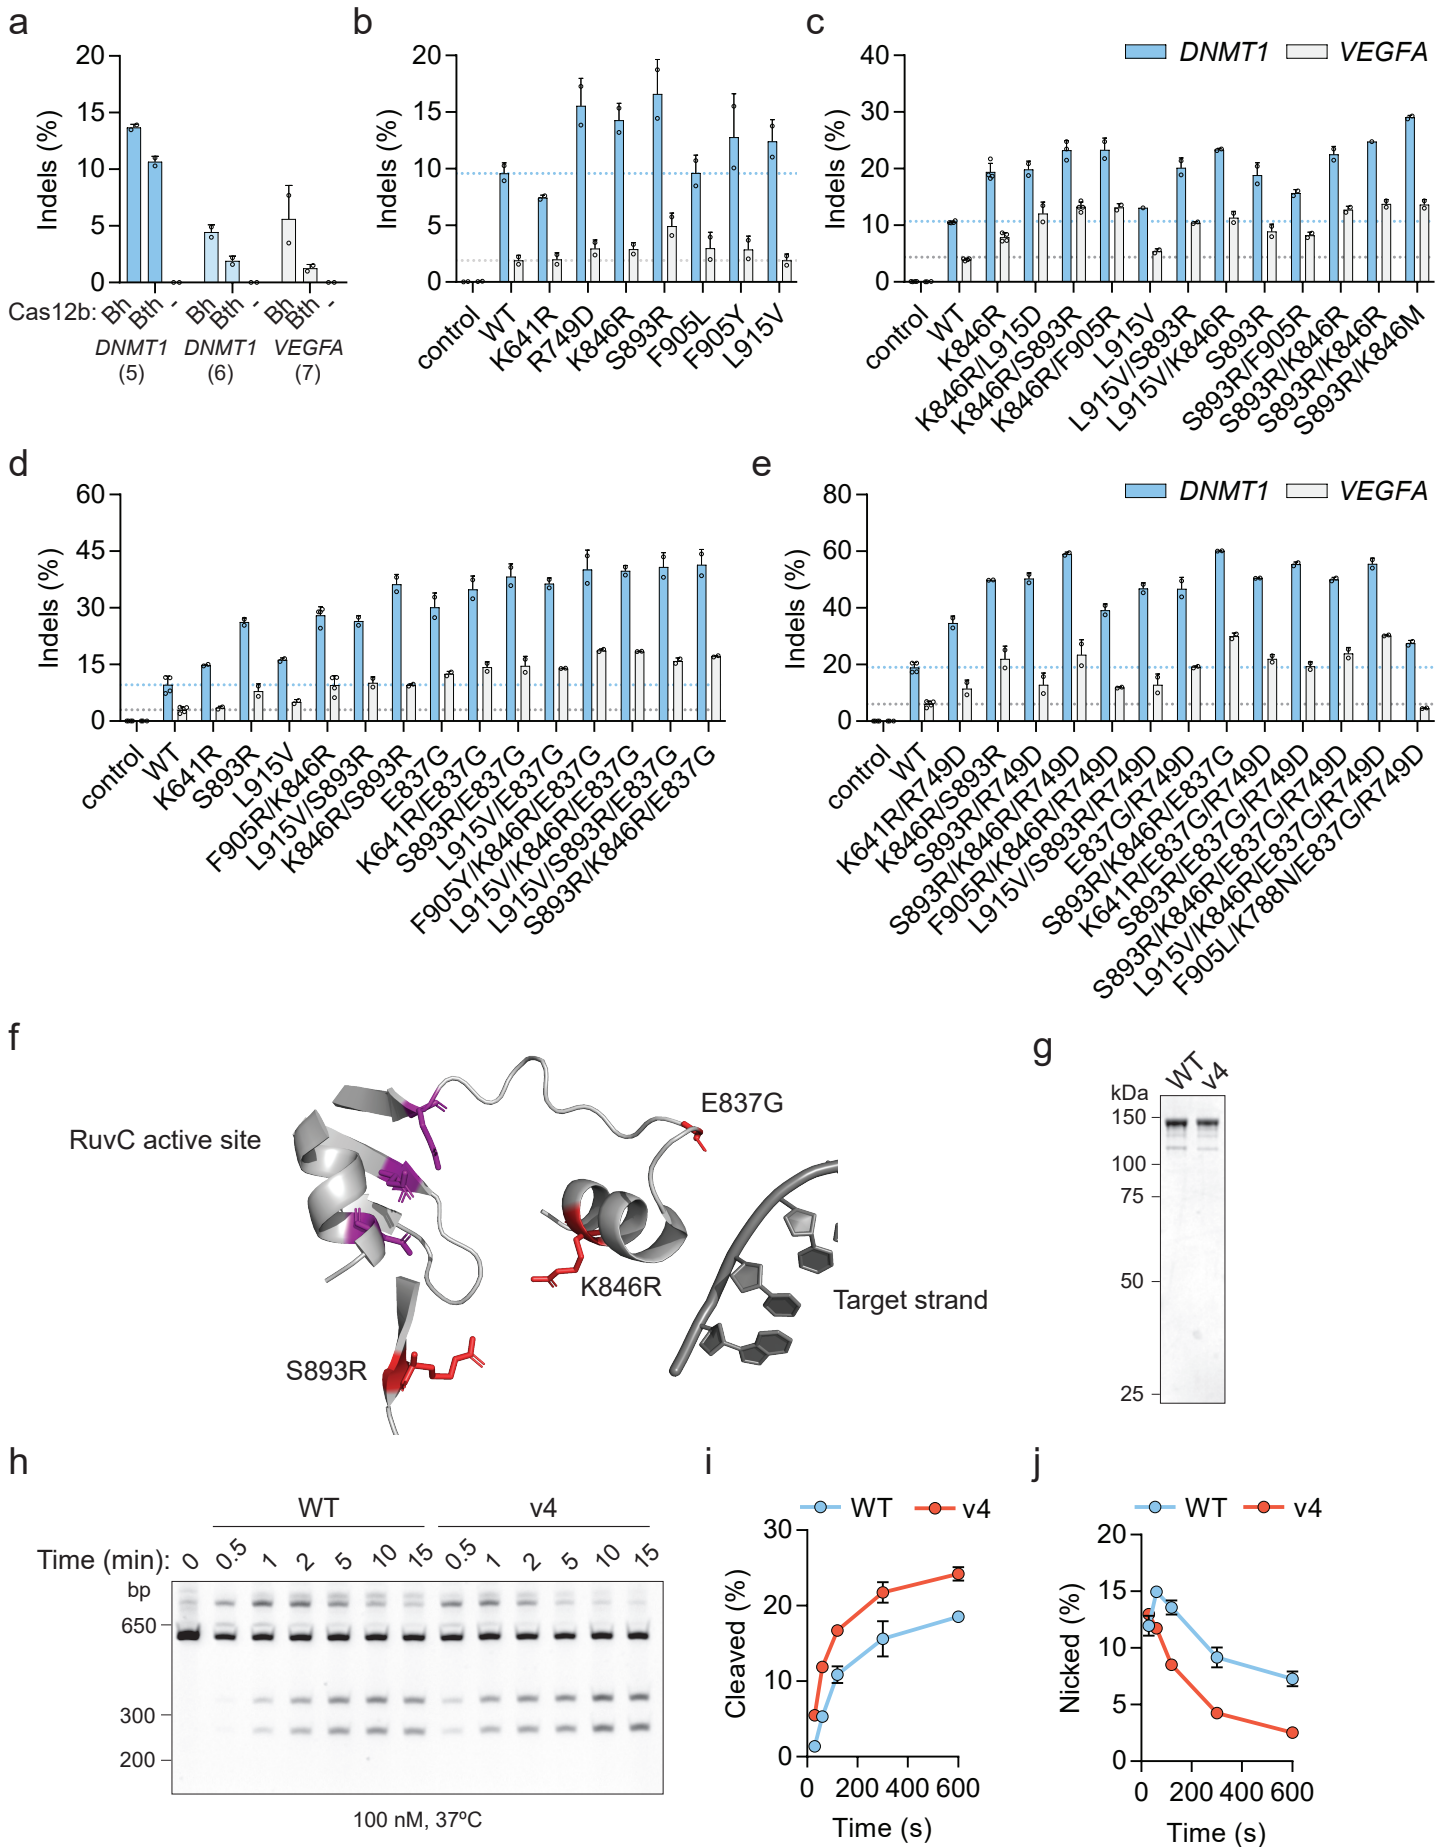

#### **Supplementary Figure 4. Rational engineering of BhCas12b**

**a)** Comparison of indel activity between BhCas12b and the highly similar BthCas12b in 293T cells. Error bars represent s.d. from n=2 replicates. **b-e)** Indel activity of BhCas12b mutant combinations at *DNMT1* (target 5) and *VEGFA* (target 7). Error bars represent s.d. from a minimum of n=2 replicates. **f)** BhCas12b v4 mutations modeled into the structure of BthCas12b (PDB:5wti [[10.2210/pdb5WTI/pdb](https://doi.org/10.2210/pdb5WTI/pdb)]) using Pymol (Schrodinger). **g)** Coomassie stained SDS-PAGE gel of purified BhCas12b WT and v4 protein. **h)** In vitro cleavage time-course with BhCas12b WT and v4 variant. Gel is representative image from n=3 experiments. **i,j)** Quantitation of dsDNA cleavage products (**i**) and upper nicked product (**j**) from the reactions shown in panel **h**. Error bars represent s.d. from n=3 experiments. Source data are provided as a Source Data file.

# Supplementary Figure 5. BhCas12b v4 mediates genome editing in human cell lines

a

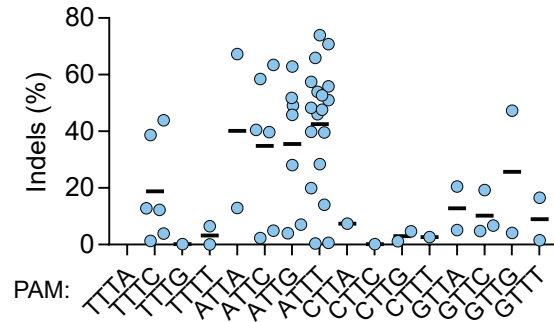

b

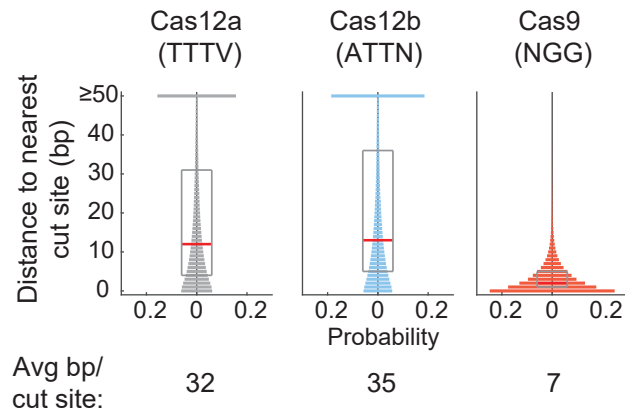

c

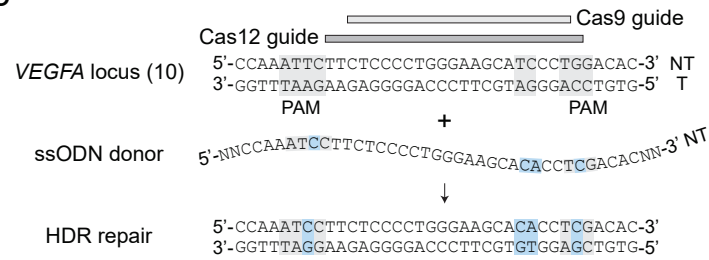

d

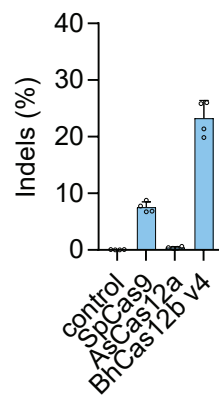

e

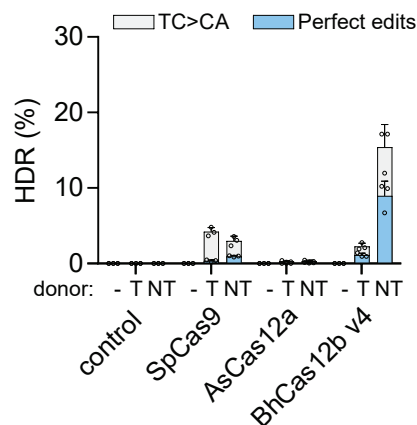

### **Supplementary Figure 5. BhCas12b v4 mediates genome editing in human cells lines**

**a)** BhCas12b v4 indel activity in 293T cells at 56 targets. Each dot represents a single target site, averaged from n=4 replicates. **b)** Analysis of PAM prevalence for Class 2 CRISPR-Cas nucleases. Probability mass function for the distance from each base within non-masked human coding sequences to the nearest Cas9 or Cas12 cleavage site. **c)** Schematic of a *VEGFA* (target 10) site targetable by SpCas9 and Cas12b nucleases and a 120-nt ssODN donor containing a TC to CA mutation and PAM disrupting mutations **d)** Indel activity of each nuclease at the locus. Error bars represent s.d. from n=3 replicates. **e)** Frequency of homology-directed repair (HDR) using a target strand (T) or non-target strand (NT) donor. Grey bars indicate the frequency of TC to CA mutation, while blue bars indicate perfect edits with no detectable mutations in the 36-nt sequence shown in panel **c**. Error bars represent s.d. from n=3 replicates. Source data are provided as a Source Data file.





**Supplementary Figure 6. Specificity analysis of matched CRISPR-Cas nuclease targets**

Full Guide-Seq analysis of detected off-targets in Fig. 4b. A list of detected cleavage sites (up to 20 per target) is presented for each nuclease with the on-target site denoted with a small box. Mismatches to the guide sequence are highlighted.

# Supplementary Figure 7. Specificity analysis of unmatched CRISPR-Cas nuclease targets

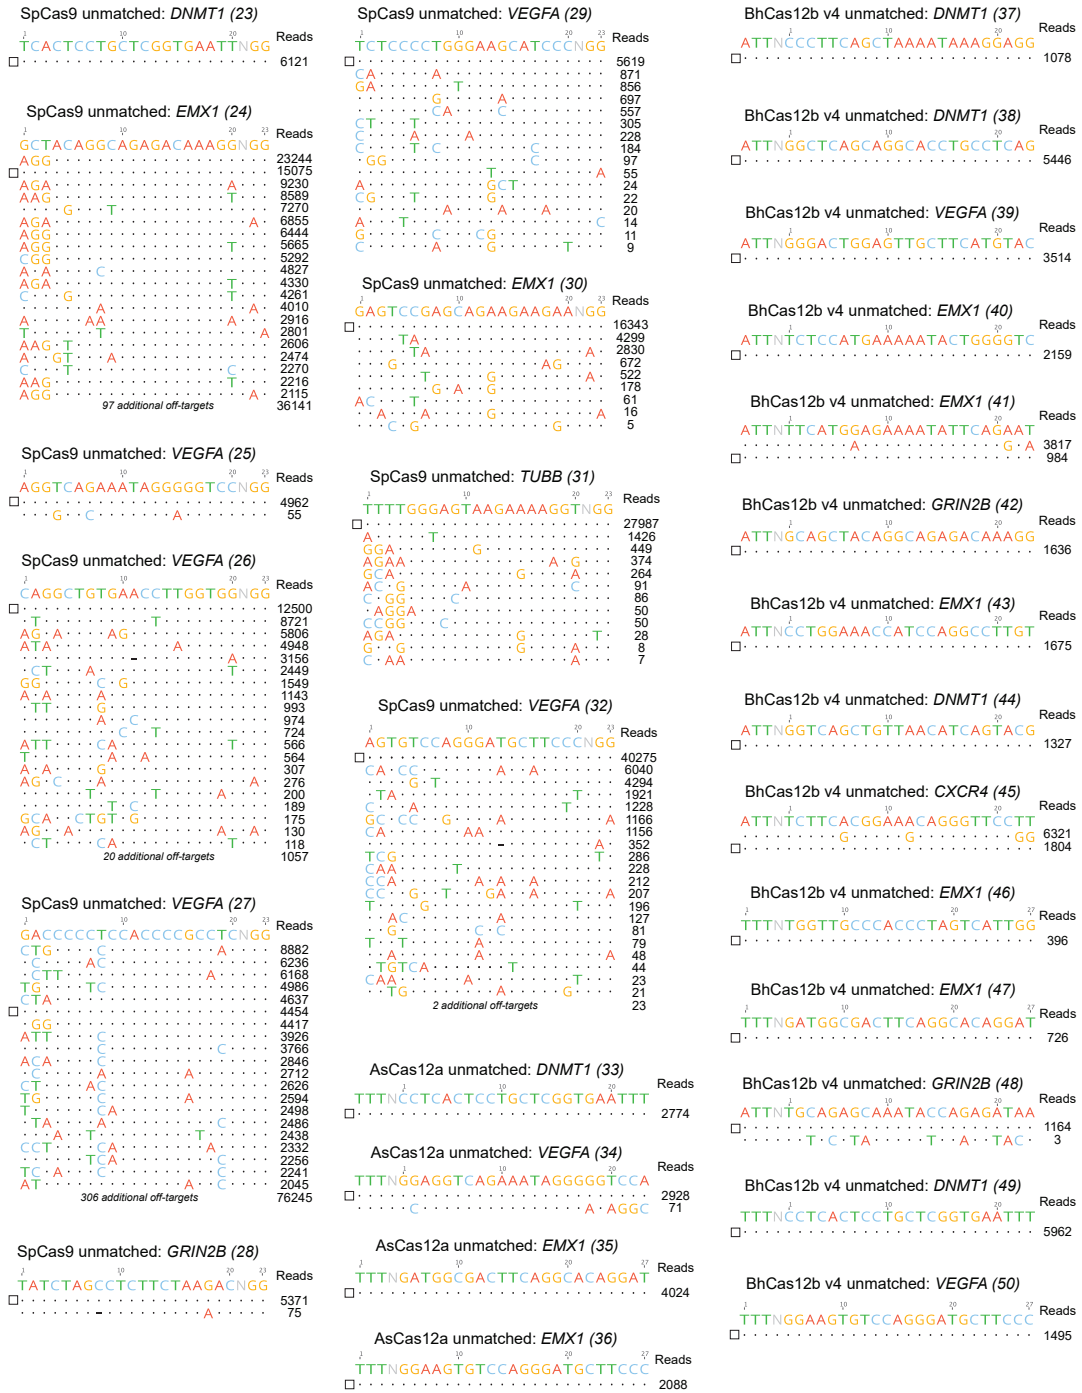

**Supplementary Figure 7. Specificity analysis of unmatched CRISPR-Cas nuclease targets**

Full Guide-Seq analysis of detected off-targets for unmatched targets. A list of detected cleavage sites (up to 20 per target) is presented for each nuclease with the on-target site denoted with a small box. Mismatches to the guide sequence are highlighted.



### **Supplementary Figure 8. Characterization of BvCas12b**

**a)** PAM discovery as described in Supplementary Fig. 1b,c. **b)** Alignment of small RNA-Seq reads for BvCas12b. The location of the tracrRNA used in cleavage reactions is highlighted in yellow. **c,d)** In vitro reactions with 250 nM purified BvCas12 protein and synthesized RNA were carried out at the indicated temperatures for 90 min. **e)** Coomassie stained SDS-PAGE gel of purified BvCas12b. **f)** BvCas12b sgRNA variants. The location of deletions is denoted with a red line. **g)** Schematic of BvCas12b sgRNA design 1 with grey shading highlighting the location of changes to the guide design in variants 2 - 6. **h)** BvCas12b indel activity in 293T cells with sgRNA variants. Error bars represent s.d. from n=4 replicates. **i)** BvCas12b indel activity in 293T cells at 57 targets. Each dot represents a single target site, averaged from n=4 replicates. **j)** Correlation of BhCas12b v4 and BvCas12b activity at matched target sites. Source data are provided as a Source Data file.

# Supplementary Figure 9. BvCas12b mismatch tolerance and specificity

a

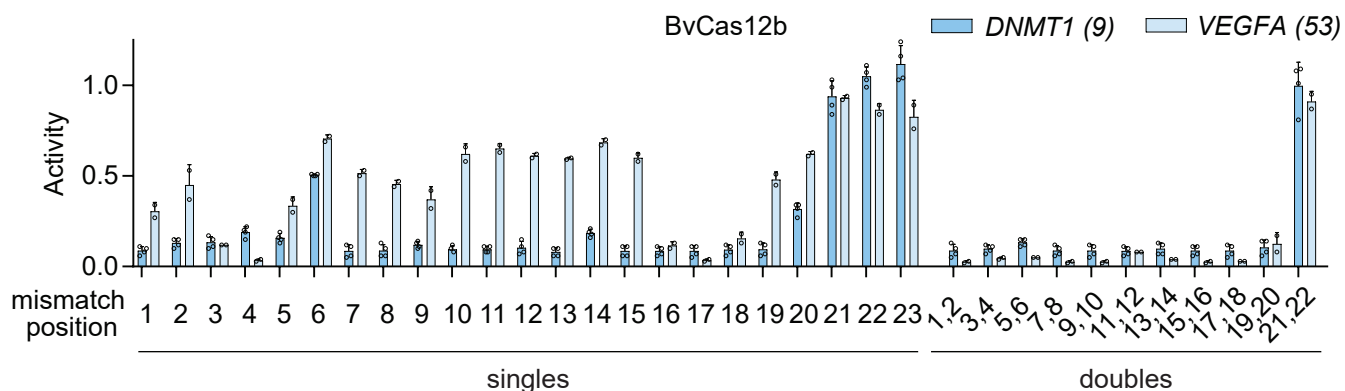

b

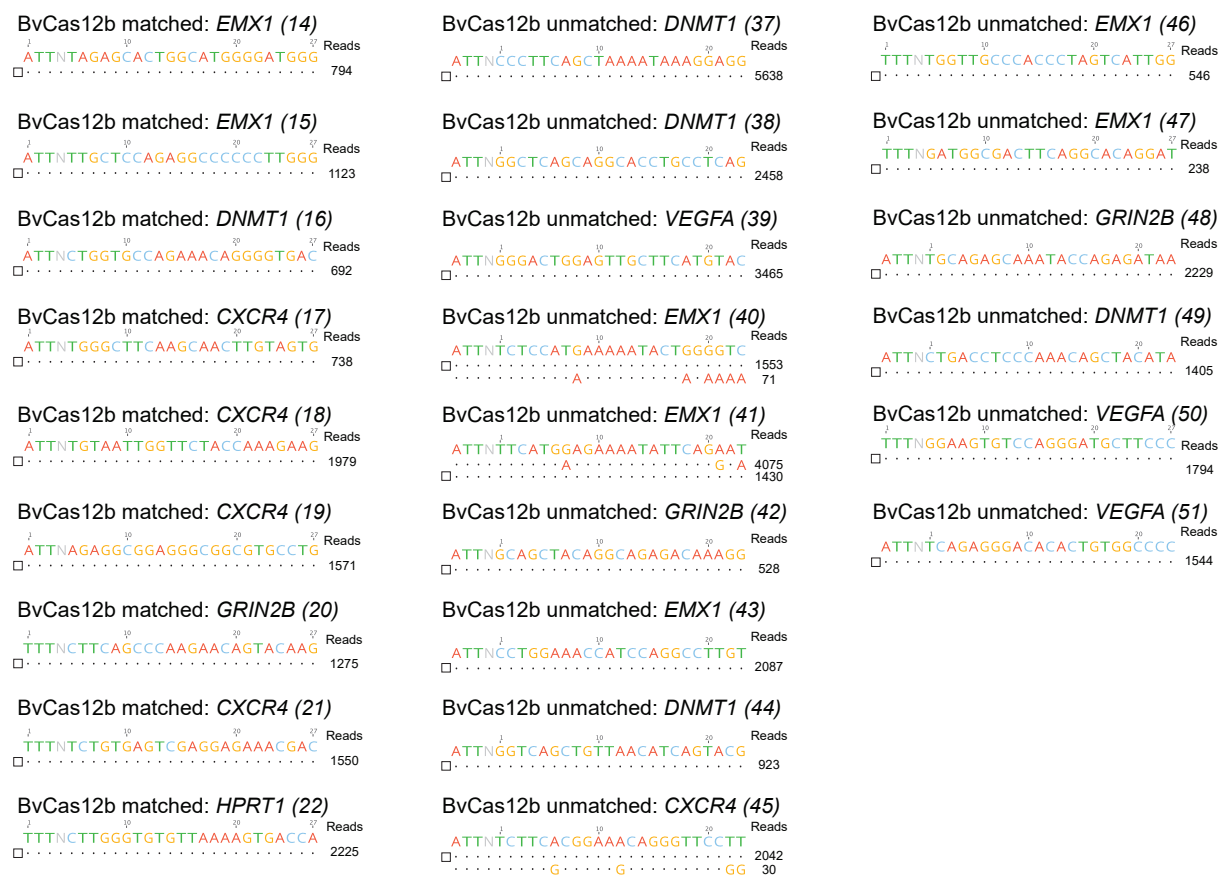

**Supplementary Figure 9. BvCas12b mismatch tolerance and specificity**

**a)** BvCas12b indel activity in 293T cells when mismatches are present between the guide sgRNA and target DNA. Mismatches were inserted in the sgRNA to match the target strand (i.e., C to G, A to T). Error bars represent s.d. from n=4 replicates. **b)** Guide-Seq analysis of BvCas12b at 24 targets. A list of detected cleavage sites is presented with the on-target site denoted with a small box. Mismatches to the guide sequence are highlighted. Source data are provided as a Source Data file.

**Supplementary Table 1: Guide sequences used in this study**

| <b>Gene</b>   | <b>Target</b> | <b>5' PAM</b> | <b>Sequence</b>          |
|---------------|---------------|---------------|--------------------------|
| <i>DNMT1</i>  | 1             | GTTCT         | AGACCCAGAGGCTCAAGTGAGCA  |
| <i>DNMT1</i>  | 2             | ATTTT         | AGCTGAAGGGAAATAAAAGGAAA  |
| <i>VEGFA</i>  | 3             | ATTCT         | TCTCCCCTGGGAAGCATCCCTGG  |
| <i>EMX1</i>   | 4             | ATTTT         | TCATGGAGAAAATATTCAGAATC  |
| <i>DNMT1</i>  | 5             | TTTC          | CCTCACTCCTGCTCGGTGAATTT  |
| <i>DNMT1</i>  | 6             | TTTG          | AGGAGTGTTTCAGTCTCCGTGAAC |
| <i>VEGFA</i>  | 7             | TTTG          | GGAGGTCAGAAATAGGGGGTCCA  |
| <i>VEGFA</i>  | 8             | TTTC          | CAAAGCCCATTCCCTCTTTAGCC  |
| <i>DNMT1</i>  | 9             | ATTT          | CCCTTCAGCTAAAATAAAGGAGG  |
| <i>VEGFA</i>  | 10            | ATTC          | TTCTCCCCTGGGAAGCATCCCTG  |
| <i>GRIN2B</i> | 11            | ATTC          | TGCAGAGCAAATACCAGAGATAA  |
| <i>PDCD1</i>  | 12            | ATTG          | CGCCGGGCCCTGACCACGCTCAT  |
| <i>CXCR4</i>  | 13            | ATTC          | CCGACTTCATCTTTGCCAACGTC  |
| <i>EMX1</i>   | 14            | ATTT          | TAGAGCACTGGCATGGGGATGGG  |
| <i>EMX1</i>   | 15            | ATTC          | TTGCTCCAGAGGCCCCCTTGGG   |
| <i>DNMT1</i>  | 16            | ATTC          | CTGGTGCCAGAAACAGGGGTGAC  |
| <i>CXCR4</i>  | 17            | ATTC          | TGGGCTTCAAGCAACTTGTAGTG  |
| <i>CXCR4</i>  | 18            | ATTT          | TGTAATTGGTTCTACCAAAGAAG  |
| <i>CXCR4</i>  | 19            | ATTT          | AGAGGCGGAGGGCGGCGTGCCTG  |
| <i>GRIN2B</i> | 20            | TTTC          | CTTCAGCCCAAGAACAGTACAAG  |
| <i>CXCR4</i>  | 21            | TTTC          | TCTGTGAGTCGAGGAGAAACGAC  |
| <i>HPRT1</i>  | 22            | TTTC          | CTTGGGTGTGTTAAAAGTGACCA  |
| <i>DNMT1</i>  | 23            | -             | TCACTCCTGCTCGGTGAATT     |
| <i>EMX1</i>   | 24            | -             | GCTACAGGCAGAGACAAAGG     |
| <i>VEGFA</i>  | 25            | -             | AGGTCAGAAATAGGGGGTCC     |
| <i>VEGFA</i>  | 26            | -             | CAGGCTGTGAACCTTGGTGG     |
| <i>VEGFA</i>  | 27            | -             | GACCCCTCCACCCCGCCTC      |
| <i>GRIN2B</i> | 28            | -             | GTATCTAGCCTCTTCTAAGAC    |
| <i>VEGFA</i>  | 29            | -             | TCTCCCCTGGGAAGCATCCC     |
| <i>EMX1</i>   | 30            | -             | GAGTCCGAGCAGAAGAAGAA     |
| <i>TUBB</i>   | 31            | -             | TTTTGGGAGTAAGAAAAGGT     |
| <i>VEGFA</i>  | 32            | -             | AGTGTCCAGGGATGCTTCCC     |
| <i>DNMT1</i>  | 33            | TTTC          | CCTCACTCCTGCTCGGTGAATTT  |
| <i>VEGFA</i>  | 34            | TTTG          | GGAGGTCAGAAATAGGGGGTCCA  |
| <i>EMX1</i>   | 35            | TTTG          | GATGGCGACTTCAGGCACAGGAT  |
| <i>EMX1</i>   | 36            | TTTG          | GGAAGTGTCCAGGGATGCTTCCC  |
| <i>DNMT1</i>  | 37            | ATTT          | CCCTTCAGCTAAAATAAAGGAGG  |



|               |    |      |                         |
|---------------|----|------|-------------------------|
| <i>DNMT1</i>  | 38 | ATTT | GGCTCAGCAGGCACCTGCCTCAG |
| <i>VEGFA</i>  | 39 | ATTT | GGGACTGGAGTTGCTTCATGTAC |
| <i>EMX1</i>   | 40 | ATTT | TCTCCATGAAAAATACTGGGGTC |
| <i>EMX1</i>   | 41 | ATTT | TTCATGGAGAAAATATTCAGAAT |
| <i>GRIN2B</i> | 42 | ATTG | GCAGCTACAGGCAGAGACAAAGG |
| <i>EMX1</i>   | 43 | ATTT | CCTGGAAACCATCCAGGCCTTGT |
| <i>DNMT1</i>  | 44 | ATTG | GGTCAGCTGTTAACATCAGTACG |
| <i>CXCR4</i>  | 45 | ATTT | TCTTCACGGAAACAGGGTTCCTT |
| <i>EMX1</i>   | 46 | TTTG | TGGTTGCCACCCTAGTCATTGG  |
| <i>EMX1</i>   | 47 | TTTG | GATGGCGACTTCAGGCACAGGAT |
| <i>DNMT1</i>  | 49 | TTTC | CCTCACTCCTGCTCGGTGAATTT |
| <i>VEGFA</i>  | 50 | TTTG | GGAAGTGTCCAGGGATGCTTCCC |
| <i>DNMT1</i>  | 51 | ATTT | GGCTCAGCAGGCACCTGCCTCAG |
| <i>EMX1</i>   | 52 | ATTT | TTCATGGAGAAAATATTCAGAAT |
| <i>VEGFA</i>  | 53 | ATTT | CTGACCTCCCAAACAGCTACATA |
